# Supplementary material for: Suppression of the photocatalytic activity of ZnO fabricated by the sol–gel method under gentle vacuum for highly durable organic solar cells
Source: Royal Society of Chemistry journal article supplement (doi:10.1039/d2se01243j), 2022-12-12
Supplement: d2se01243j1.pdf [file d2se01243j1.pdf]

## **Suppression of Photocatalytic Activity of ZnO Fabricated by Sol-Gel Method under Gentle Vacuum Condition for Highly Durable Organic Solar Cells**

Masahiro Nakano<sup>a\*</sup>, Tomoki Kobayashi<sup>a</sup>, Masaki Kaneda<sup>a</sup>, Sae Nakagawa<sup>a</sup>, Md. Shahiduzzaman<sup>b</sup>, Makoto Karakawa<sup>a,b,c</sup>, Tetsuya Taima<sup>a,b,c</sup>

<sup>a</sup>Graduate School of Natural Science and Technology, Kanazawa University, Kakuma-machi, Kanazawa, Ishikawa 920-1192, Japan

<sup>b</sup>Nanomaterial Research Institute (NanoMaRI), Kanazawa University, Kakuma-machi, Kanazawa, Ishikawa 920-1192, Japan

<sup>c</sup>Institute for Frontier Science Initiative (InFiniti), Kanazawa University, Kakuma-machi, Kanazawa, Ishikawa 920-1192, Japan

### Contents

1. Electrical resistance measurement of ZnO films
2. Water-contact angle measurement of ZnO films
3. Summarized photovoltaic properties
4. Changes of Photovoltaic properties with photo-irradiation time
5. Changes of  $R_{\text{ZnO}}$  with photo-irradiation time
6. Thermal stability testing of ZnO<sup>air</sup>-based OSCs

## 1. Electrical resistance measurement of ZnO films

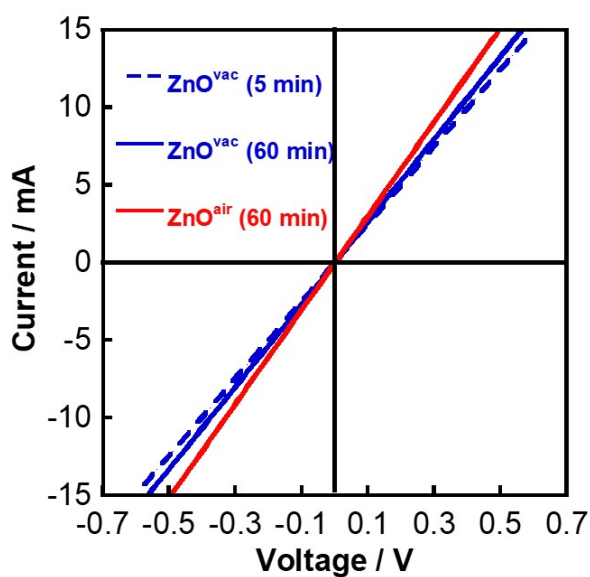

**Figure S1.**  $J$ - $V$  characteristics of ZnO films sandwiched by ITO and Ag electrodes (ITO/ZnO/Ag).

## 2. Water-contact angle measurement of ZnO films

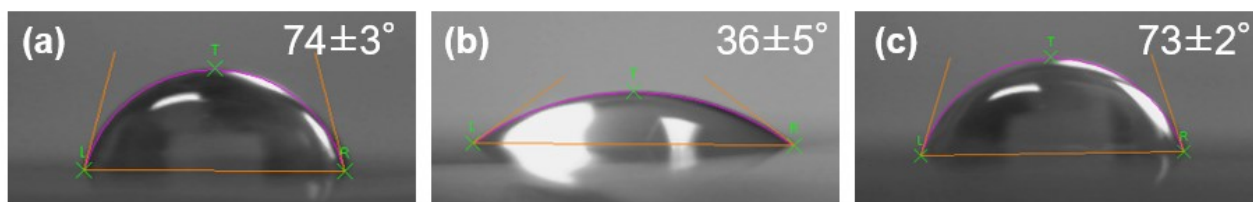

**Figure S2.** Water-contact angle measurement of ZnO<sup>vac</sup> (a) and ZnO<sup>air</sup> (b) prepared by 60 minutes of thermal annealing (100°C), ZnO<sup>vac</sup> prepared by 5 minutes of thermal annealing (c).

## 3. Summarized photovoltaic properties

**Table S1.** Summary of photovoltaic properties of OSCs based on ZnO<sup>air</sup> and ZnO<sup>vac</sup>.

| ZnO Preparation | $J_{sc}$<br>/ mAcm <sup>-2</sup> | $V_{oc}$<br>/ V | FF          | PCE / %    |
|-----------------|----------------------------------|-----------------|-------------|------------|
| in air          | 9.1 (±0.2)                       | 0.57 (±0.0)     | 0.61 (±0.0) | 3.1 (±0.1) |
| under vacuum    | 9.0 (±0.3)                       | 0.57 (±0.1)     | 0.61 (±0.1) | 3.1 (±0.2) |

#### 4. Changes of Photovoltaic properties with photo-irradiation time

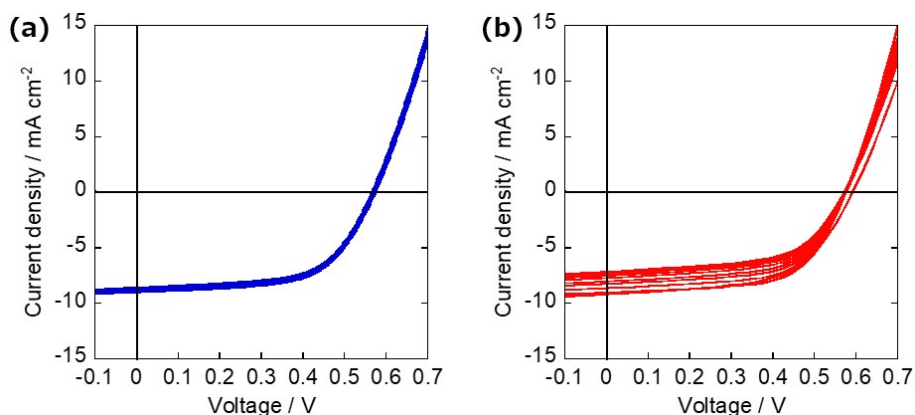

**Figure S3.** Changes in typical  $J$ - $V$  characteristics of OSCs based on  $\text{ZnO}^{\text{vac}}$  (a) and  $\text{ZnO}^{\text{air}}$  (b) with photoirradiation time (0–100 h).

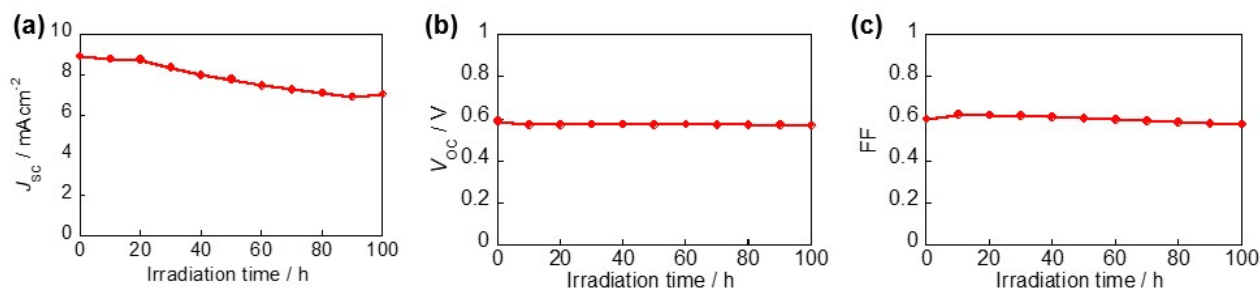

**Figure S4.** Changes in  $J_{\text{sc}}$  (a),  $V_{\text{oc}}$  (b), and FF (c) values with continuous photoirradiation of OSCs based on  $\text{ZnO}^{\text{air}}$ .

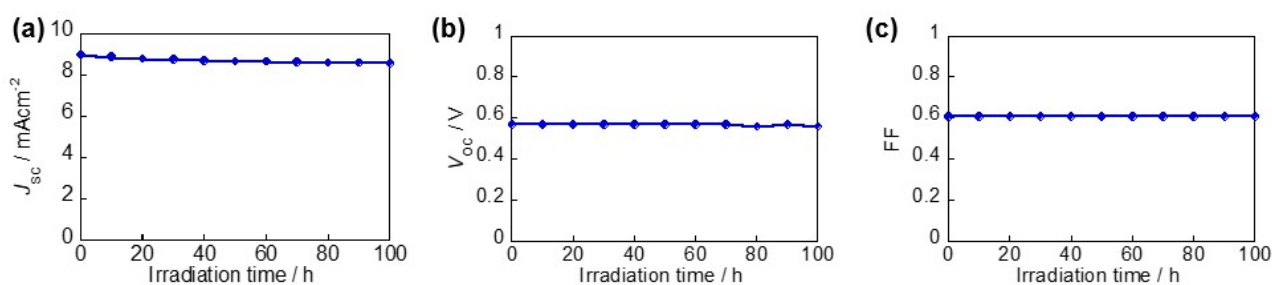

**Figure S5.** Changes in  $J_{\text{sc}}$  (a),  $V_{\text{oc}}$  (b), and FF (c) values with continuous photoirradiation of OSCs based on  $\text{ZnO}^{\text{vac}}$ .

## 5. Changes of $R_{ZnO}$ with photo-irradiation time

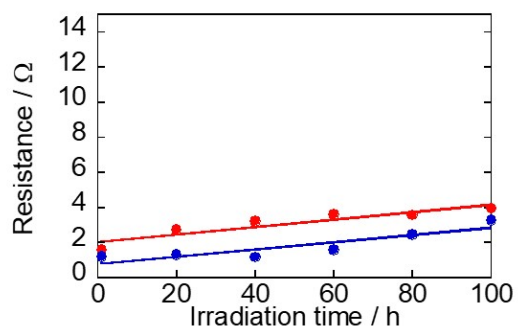

**Figure S6.** Changes in  $R_{ZnO}$  of OSCs based on  $ZnO^{vac}$  (blue trace) and  $ZnO^{air}$  (red trace) with photo-irradiation time (0–100 h).

## 6. Thermal stability testing of ZnO<sup>air</sup>-based OSCs

The thermal stability of ZnO<sup>air</sup>-based OSCs was investigated under dark conditions at 65°C which is similar temperature during continuous photoirradiation. The ZnO<sup>air</sup>-based device showed good thermal stability; the PCE value of the ZnO<sup>air</sup>-based OSC was kept 97% of the initial value after 50 h of thermal stability testing (Figure S7). Moreover, AC-impedance measurement of the ZnO<sup>air</sup>-based device indicates that the active layer does not decompose by thermal heating without photo-irradiation (Figure S8). Considering the poor stability of ZnO<sup>air</sup>-based devices under continuous photo-irradiation, the photo-degradation of active layer materials on ZnO<sup>air</sup> should be caused by photo-catalytic reaction.

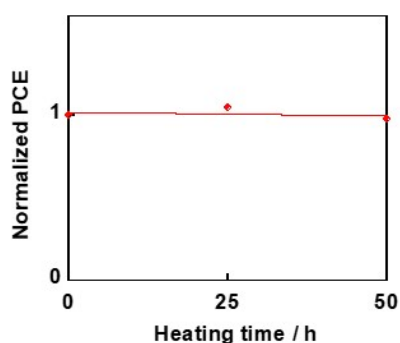

**Figure S7.** Changes of PCE of ZnO<sup>air</sup>-based OSC under dark conditions at 65°C.

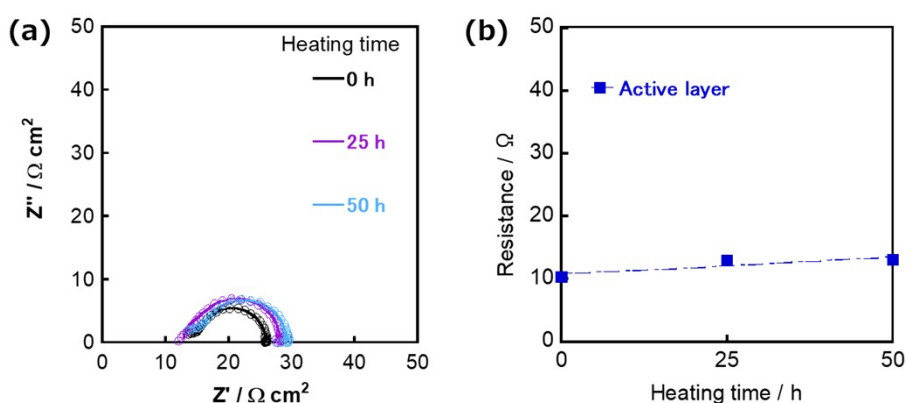

**Figure S8.** Nyquist plots of the ZnO<sup>air</sup>-based OSC (a) and changes in resistance values of the active layer of the ZnO<sup>air</sup>-based OSC with continuous thermal annealing (65°C) without photo-irradiation.
